# Supplementary material
Source: PubMed Central journal article supplement (PMC2516266)
Supplement: 0803689105_0803689105SI.pdf [file 0803689105_0803689105SI.pdf]

# Supporting Information

Leroux et al. 10.1073/pnas.0803689105

## SI Text

### Materials and Methods

**Site-Directed Mutagenesis, Protein Production, and Purification.** The *D. fructosovorans* and *E. coli* strains, plasmids and growth conditions used in this study are described in ref. 1.

The Quikchange XL mutagenesis kit (Stratagene) was used to generate point mutations in the large subunit *hynB*. The *AatII-PstI* fragment from pBGF4 was subcloned in pUC18 to generate a template that was used in mutagenesis experiments. After having performed the mutagenesis following the manufacturer's instructions, the *AatII-PstI* fragment was fully sequenced and inserted in the *AatII-PstI* digested pBGF4. The recombinant plasmids were introduced into *D. fructosovorans* strain MR 400 by electrotransformation (2).

The Strep tag II sequence (IBA) was introduced at the 5' terminus of the large subunit gene and the protein was purified using the Strep-Tactin Superflow resin (IBA). MR 400 cells producing WT and variant hydrogenases were harvested, resuspended in Tris/HCl 100 mM pH 8, 150 mM NaCl (buffer A) and disrupted in a French press. After centrifugation at 193000g for 90min, the supernatant was loaded onto a column of Strep-Tactin Superflow resin (1 × 25 cm) equilibrated with buffer A. After washing with buffer A, hydrogenase was eluted with buffer A containing 2.5 mM desthiobiotin. The buffer was exchanged against 50 mM Hepes/NaOH pH 7.5 (buffer B) and the proteins were concentrated to ≈2 ml using a Vivaspin 20 concentrator (30,000 MWCO PES membrane, Vivasciences). An additional anion exchange purification step using a 1 ml HiTrap Q HP column (GE Healthcare) was performed to remove any contaminant. The protein was loaded onto the column equilibrated with buffer B and eluted with a linear gradient of 1M NaCl. The hydrogenase-containing fractions were pooled and the buffer was exchanged against 50 mM Hepes/NaOH, pH 8.

We describe in the main text the properties of the L122F-V74I and L122M-V74M mutants. The four corresponding single mutants were originally purified and tested (i) in solution assays of H<sub>2</sub> oxidation, and (ii) using PFV to determine the  $K_m$  for H<sub>2</sub> and the rates of inhibition. Three of these mutants (L122F, V74I, L122M) displayed the WT phenotype and were not further characterized. The V74M mutant has slightly different properties, which will be reported elsewhere (unpublished work).

**EPR and Potentiometric Titrations.** The EPR spectra were recorded on a Bruker ELEXSYS E500 spectrometer fitted with an Oxford Instruments ESR 900 helium flow cryostat. For spin quantitation, the double integration of the signal recorded under non saturating conditions was compared with that given by a CuSO<sub>4</sub> (1 mM) standard at the same temperature.

The redox titration of the mutants was carried out at 25°C in a specially designed anaerobic cell containing a solution of purified enzyme (≈ 60 μM) in 50 mM Hepes buffer at pH 8 under an atmosphere of Ar. Redox potentials were measured with a combined Pt-Ag/AgCl/KCl (3M) microelectrode, in the presence of a mixture of mediators consisting of 6 μM in each of 1,2 naphthoquinone, resorufine, phenosafranine, neutral red and methyl viologen. The titration was conducted by stepwise additions of small amounts of sodium dithionite solution (10 mM in oxygen-free Hepes buffer). All potentials are quoted against the standard hydrogen electrode (SHE).

**Hydrogen Oxidation Assays.** The assays were carried out as described (4). The purified enzymes were activated for 1h at 37°C in an anaerobic cuvette containing 500 μl of 100 mM Tris/HCl buffer at pH 8 with 2 mM MV. H<sub>2</sub>-oxidation activity was measured at 30°C in a UV cuvette containing 1 ml of buffer Tris/HCl 100 mM at pH 8 with 50 mM methyl viologen (MV, caution: toxic and suspected mutagen). Oxygen was removed under vacuum, the cuvette was flushed with pure H<sub>2</sub>, and dithionite was added to eliminate the residual oxygen. The reaction was started by the addition of 5–20 μl of stock solution of activated enzyme (30–55 nM), and the rate of MV reduction was measured at 604 nm with a UV 1601 spectrophotometer (Shimadzu).

**Isotope-Exchange Assays.** Isotope exchange measurements were carried out using the setup described in ref. 5. D<sub>2</sub> was bubbled in 1.5 ml of 20 mM K-phosphate buffer, pH 7, kept at 30°C in a closed, thermostated vessel. The solution was stirred continuously with a magnetic stirrer. The bottom of the vessel was sealed by a polypropylene membrane, allowing dissolved gases to be directly introduced through a vacuum line into the ion source of the mass spectrometer (model MM 880; VG Instruments). The spectrometer sequentially scans the abundance of the different gases (H<sub>2</sub>, D<sub>2</sub>, HD, and O<sub>2</sub>) by automatically adjusting the magnet current to the corresponding mass peaks ( $m/e = 2, 4, 3$ , and 32, respectively). Measuring one mass peak typically takes 0.5 s. The vessel was closed and anoxia was contained by adding glucose (5 mM), glucose oxidase (30 units), and catalase (500 units). Before measurements, the hydrogenase was activated under an atmosphere of H<sub>2</sub> in the presence of 100 μM reduced methyl viologen. After the enzyme is added, the hydrogenase activity results in D<sup>+</sup>/H<sup>+</sup> scrambling, which is detected by continuously monitoring the consumption of D<sub>2</sub> and the formation of HD and H<sub>2</sub>. The spectrometer sensitivity was calibrated, and the first-order rate constants for gas consumption by the spectrometer were determined in control experiments where the solution was initially saturated under an atmosphere of known composition, and the exponential decrease of the concentration over time was monitored.

**Protein Film Voltammetry.** We used the electrochemical setup and equipment described in ref. 3. All PFV experiments were carried out in a glove box (Jacomex) under a N<sub>2</sub> atmosphere (O<sub>2</sub> < 1 ppm). The electrochemical cell, thermostated at the desired *T* using a water circulation system, was housed in a Faraday cage. A PGE rotating disk working electrode (area  $A \approx 3 \text{ mm}^2$ ) was used in conjunction with an EG&G M636 electrode rotator, a platinum wire was used as a counter electrode, and a saturated calomel electrode (SCE), located in a Luggin side arm containing 0.1 M NaCl and maintained at room temperature, was used as a reference. All potentials are quoted versus the standard hydrogen electrode (SHE),  $E_{\text{SHE}} = E_{\text{SCE}} + 241 \text{ mV}$  at room temperature.



In Fig. S1,  $k_{\text{out}}$  is the first-order rate constant which incorporates gas dissociation and diffusion to the bulk,  $k_{\text{in}}$  is the bimolecular rate constant which relates to gas diffusion toward the active site and binding,  $k$  is the rate of  $\text{H}^+/\text{D}^+$  exchange. The rate constant from  $dh$  to  $hh$  is  $k/2$  (rather than  $k$ ) because we assume that the forms  $dh$  and  $hd$  are in rapid equilibrium, but only one of them has the  $\text{D}^+$  on the active site base, ready to be exchanged.

The differential equations that describe the evolution of the system are:

$$d[ee]/dt = -k_{\text{in}} \times [ee] \times ([\text{D}_2] + [\text{HD}] + [\text{H}_2]) + k_{\text{out}}([hh] + [dh] + [dd]) \quad [4a]$$

$$d[dd]/dt = k_{\text{in}} \times [ee] \times [\text{D}_2] - (k + k_{\text{out}}) \times [dd] \quad [4b]$$

$$d[dh]/dt = k_{\text{in}} \times [ee] \times [\text{HD}] + k \times [dd] - (k_{\text{out}} + k/2) \times [dh] \quad [4c]$$

$$d[hh]/dt = k_{\text{in}} \times [ee] \times [\text{H}_2] + k/2 \times [dh] - k_{\text{out}} \times [hh] \quad [4d]$$

$$d[\text{D}_2]/dt = -k_{\text{in}} \times [\text{D}_2] \times [ee] + k_{\text{out}} \times [dd] \quad [4e]$$

$$d[\text{HD}]/dt = -k_{\text{in}} \times [\text{HD}] \times [ee] + k_{\text{out}} \times [dh] \quad [4f]$$

$$d[\text{H}_2]/dt = -k_{\text{in}} \times [\text{H}_2] \times [ee] + k_{\text{out}} \times [hh] \quad [4g]$$

and the initial conditions are  $[ee] = e_0$ ,  $[dd] = 0$ ,  $[dh] = 0$ ,  $[hh] = 0$ ,  $[\text{D}_2] = c_0$ ,  $[\text{HD}] = 0$ ,  $[\text{H}_2] = 0$ . The steady state values of  $[ee]$ ,  $[dd]$ ,  $[hh]$  are obtained by solving

$$\begin{pmatrix} d[ee]/dt \\ d[dd]/dt \\ d[dh]/dt \end{pmatrix}_{e_0} = \begin{pmatrix} -k_{\text{in}}([\text{D}_2] + [\text{HD}] + [\text{H}_2]) & k_{\text{out}} & k_{\text{out}} & k_{\text{out}} \\ k_{\text{in}} \times [\text{D}_2] & -k - k_{\text{out}} & 0 & 0 \\ k_{\text{in}} \times [\text{HD}] & k & -k_{\text{out}} - k/2 & 0 \end{pmatrix} \begin{pmatrix} [ee] \\ [dd] \\ [dh] \\ [hh] \end{pmatrix} = \begin{pmatrix} 0 \\ 0 \\ 0 \\ e_0 \end{pmatrix} \quad [5]$$

The result is:

$$[ee] = \frac{e_0}{1 + k'_{\text{in}}c_0} \quad [6a]$$

$$[dd] = \frac{k'_{\text{in}}e_0}{(1 + k'_{\text{in}}c_0)} \frac{[\text{D}_2]}{(1 + k')} \quad [6b]$$

$$[dh] = \frac{k'_{\text{in}}e_0}{(1 + k'_{\text{in}}c_0)} \frac{2(k'[\text{D}_2] + (k' + 1)[\text{HD}])}{(2 + k')(1 + k')} \quad [6c]$$

$$[hh] = \frac{k'_{\text{in}}e_0}{(1 + k'_{\text{in}}c_0)} \frac{(k'^2[\text{D}_2] + k'(k' + 1)[\text{HD}] + (2 + k')(1 + k')[\text{H}_2])}{(2 + k')(1 + k')} \quad [6d]$$

$$k' = k/k_{\text{out}} \quad [6e]$$

$$k'_{\text{in}} = k_{\text{in}}/k_{\text{out}} \quad [6f]$$

This is substituted in Eqs. 4e–4g to obtain the change in gas concentrations against time.

$$[\text{D}_2](t) = c_0 e^{-k_{\text{D}}t} \quad [7a]$$

$$[\text{HD}](t) = 2c_0[e^{-k_{\text{T}}t} - e^{-k_{\text{D}}t}] \quad [7b]$$

$$[\text{D}_2](t) + \frac{[\text{HD}](t)}{2} = c_0 e^{-k_{\text{T}}t} \quad [7c]$$

$$k_{\text{D}} = k_{\text{out}} \frac{k'}{(1 + k')} \frac{k'_{\text{in}}e_0}{(1 + k'_{\text{in}}c_0)} \quad [7d]$$

$$k_{\text{T}} = k_{\text{out}} \frac{k'}{(2 + k')} \frac{k'_{\text{in}}e_0}{(1 + k'_{\text{in}}c_0)} \quad [7e]$$

Eq. 7b shows that  $[\text{HD}]$  reaches a maximum at

$$t_{\text{max}} = \frac{\ln(k_{\text{D}}/k_{\text{T}})}{k_{\text{D}} - k_{\text{T}}} \quad [8]$$

Substituting  $t_{\text{max}}$  into Eq. 4f and letting  $d[\text{HD}]/dt = 0$  gives directly the maximum value of  $[\text{HD}]$ , which depends only on the ratio  $k' = k/k_{\text{out}}$ .

$$\frac{[\text{HD}]_{\text{max}}}{c_0} = \frac{2}{1+k'} \left( \frac{1+k'}{2+k'} \right)^{2+k'} \quad [9]$$

Eq. 9 is plotted in Fig. S2. This working curve makes it possible to estimate  $k/k_{\text{out}}$  from the maximal value of [HD]. This simple model predicts that the concentration of  $\text{D}_2$  and the isotopic content  $T = ([\text{D}_2] + [\text{HD}])/2$  decrease exponentially against time, as indeed observed in experiments, with rate constants  $k_{\text{D}}$  and  $k_{\text{T}}$ , respectively (Eqs. 7a and 7c). The value of  $k'$  can also be determined by combining these rate constants:

$$k' = \frac{2k_{\text{T}} - k_{\text{D}}}{k_{\text{D}} - k_{\text{T}}} \quad [10]$$

In experiments, we observed a background decrease in dihydrogen concentrations resulting from the slow gas consumption by the mass spectrometer. In control experiments carried out in the absence of enzyme, we found that this “leak” occurs with first-order kinetics and rate constants  $k_{\text{leak}}^{\text{H}_2} = 0.095 \text{ min}^{-1}$ ,  $k_{\text{leak}}^{\text{HD}} = 0.089 \text{ min}^{-1}$  and  $k_{\text{leak}}^{\text{D}_2} = 0.083 \text{ min}^{-1}$  (5, 8). This is slow with respect to the isotope exchange catalyzed by the WT enzyme under typical experimental conditions (e.g.,  $k_{\text{D}} = 2 \text{ min}^{-1}$  in the case of the data in Fig. 5), but this is significant in the case of the MM mutant that has slow exchange activity ( $k_{\text{D}} = 0.16 \text{ min}^{-1}$  for the data in Fig. 5). Since the above model does not explicitly include the leak, we proceeded to the following verifications. Concentration changes (as in Fig. 5) were simulated by using a version of Eq. 4 that was modified to take into account the leak (by introducing the last terms in the right-hand sides of Eqs. 11e–11g)

$$d[ee]/dt = -k_{\text{in}} \times [ee] \times ([\text{D}_2] + [\text{HD}] + [\text{H}_2]) + k_{\text{out}}([hh] + [dh] + [dd]) \quad [11a]$$

$$d[dd]/dt = k_{\text{in}} \times [ee] \times [\text{D}_2] - (k + k_{\text{out}}) \times [dd] \quad [11b]$$

$$d[dh]/dt = k_{\text{in}} \times [ee] \times [\text{HD}] + k \times [dd] - (k_{\text{out}} + k/2) \times [dh] \quad [11c]$$

$$d[hh]/dt = k_{\text{in}} \times [ee] \times [\text{H}_2] + k/2 \times [dh] - k_{\text{out}} \times [hh] \quad [11d]$$

$$d[\text{D}_2]/dt = -k_{\text{in}} \times [\text{D}_2] \times [ee] + k_{\text{out}} \times [dd] - k_{\text{leak}}^{\text{D}_2} \times [\text{D}_2] \quad [11e]$$

$$d[\text{HD}]/dt = -k_{\text{in}} \times [\text{HD}] \times [ee] + k_{\text{out}} \times [dh] - k_{\text{leak}}^{\text{HD}} \times [\text{HD}] \quad [11f]$$

$$d[\text{H}_2]/dt = -k_{\text{in}} \times [\text{H}_2] \times [ee] + k_{\text{out}} \times [hh] - k_{\text{leak}}^{\text{H}_2} \times [\text{H}_2] \quad [11g]$$

First, using a Runge-Kutta integrator, we solved this set of equations for reasonable values of the parameters. In a second step, the simulations were analyzed as if they were real data, to deduce  $k/k_{\text{out}}$  using either of the following methods:

1. Using either Eq. 9 or Eq. 10 with no correction.
2. Since the measured  $[\text{HD}]_{\text{max}}/c_0$  is lower than that which would be observed in the absence of leak, the value of  $k'$  deduced from Eq. 9 is overestimated. This can be empirically corrected by replacing  $c_0$  in Eq. 9 with the concentration  $c_0' = ([\text{H}_2] + [\text{HD}] + [\text{D}_2])$  measured at the time [HD] reaches its maximum (Eq. 8), rather than at the time of injection of the enzyme ( $c_0' < c_0$ ).
3. First, correcting the concentration profiles for the leak using the known values of  $k_{\text{leak}}$  and the method described in ref. 5. Then using Eq. 10.

We compared the values of  $k/k_{\text{out}}$  deduced using these methods with those input in the calculations. The corrections provided by methods 2 and 3 improved the estimation given by method 1, except when the exchange activity was at least an order of magnitude faster than the leak (in which case method 1 needs no correction to give an accurate result). In the worst situation (lowest activity),  $k/k_{\text{out}}$  was underestimated by a factor of two by method 2, whereas method 3 consistently provided good estimates. We applied method 1 to calculate the value in Table 1 for the WT enzyme. We used method 3 for both mutants.

1. Dementin S, et al. (2004) A glutamate is the essential proton transfer gate during the catalytic cycle of the NiFe hydrogenase. *J Biol Chem* 279:10508–10513.
2. Rousset M, et al. (1998) New shuttle vectors for the introduction of cloned DNA in *Desulfovibrio*. *Plasmid* 39:114–122.
3. Léger C, et al. (2004) Inhibition and aerobic inactivation kinetics of *Desulfovibrio fructosovorans* NiFe hydrogenase studied by protein film voltammetry. *J Am Chem Soc* 126:12162–12172.
4. Dementin S, et al. (2006) Changing the ligation of the distal [4Fe4S] cluster in NiFe hydrogenase impairs inter- and intramolecular electron transfers. *J Am Chem Soc* 128:5209–5218.
5. Cournac L, Guedeney L, Peltier G, Vignais PM (2004) Sustained photoevolution of molecular hydrogen in a mutant of *Synechocystis* sp. strain PCC 6803 deficient in the type I NADPH-dehydrogenase complex. *J Bacteriol* 186:1737–1746.
6. Léger C, Bertrand P (2008) Direct electrochemistry of redox enzymes as a tool for mechanistic studies *Chem. Rev* 108:2379–2438.
7. Almeida MG, et al. (2007) A needle in a haystack: the active site of the membrane-bound complex cytochrome c nitrite reductase. *FEBS Letts* 581:284–288.
8. Jouanneau Y, et al. (1980) Continuous monitoring, by mass spectrometry, of  $\text{H}_2$  production and recycling in *Rhodospseudomonas capsulata*. *J Bacteriol* 143:628–636.

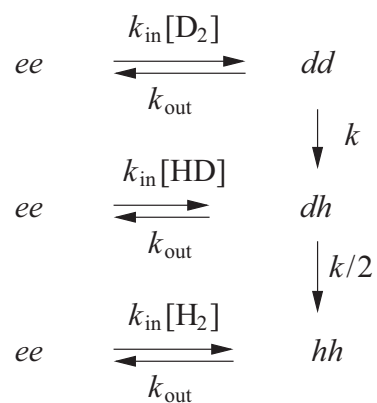

**Fig. S1.** Simplified scheme used for relating the kinetics of isotope exchange to the rates of intramolecular diffusion. *ee*, *dd*, *dh*, *hh* depict the enzyme that is either free or bound to DD, DH, and HH, respectively.

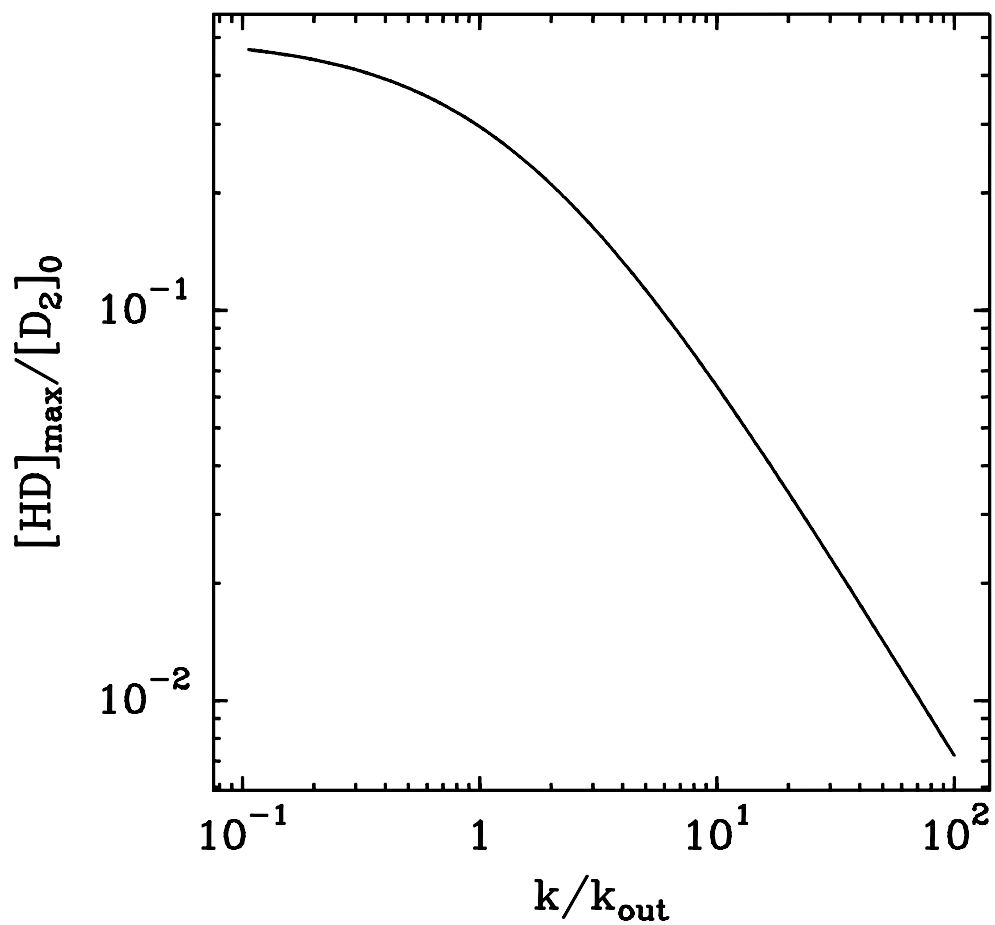

**Fig. S2.** Maximal concentration of HD, normalized to the initial concentration of  $D_2$ , as a function of the dimensionless parameter  $k' = k/k_{out}$ , according to Eq. 9.

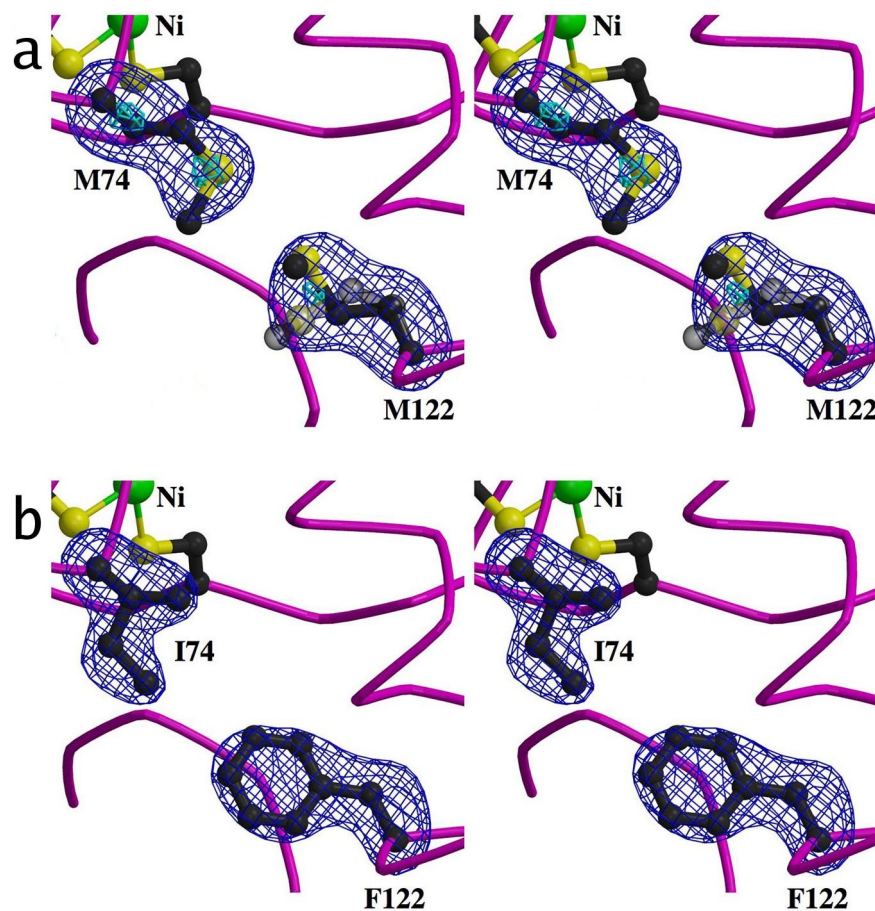

**Fig. S3.** Electron density maps. Stereo image of a 3-fold averaged omit  $mF_o - F_c$  electron density map of the side-chains of the mutated residues for the MM (a) mutant and FI mutant (b). Used contour levels 4  $\sigma$  (dark-blue) and 12  $\sigma$  (light-blue), 1  $\sigma$  being the rms. level of the respective maps.

**Table S1. Characteristics of the EPR signatures of the three enzymes in the oxidized states**

| Variant | Species | $g_x$ | $g_y$ | $g_z$ |
|---------|---------|-------|-------|-------|
| WT      | Ni-A    | 2.314 | 2.232 | 2.01  |
| WT      | Ni-B    | 2.338 | 2.157 | 2.01  |
| FI      | Ni-A    | 2.311 | 2.231 | 2.005 |
| MM      | Ni-A    | 2.307 | 2.226 | 2.005 |
| MM      | Ni-B    | 2.330 | 2.154 | 2.005 |

Table S2. X-ray data statistics

|                                                   | MM                | FI                 |
|---------------------------------------------------|-------------------|--------------------|
| X-ray wavelength, Å                               | 1.0               | 0.934              |
| Space group                                       | P2 <sub>1</sub>   | P2 <sub>1</sub>    |
| Cell dimensions: $\beta$ , °                      | 91.6              | 92.2               |
| a, b, c, Å                                        | 64.6, 99.9, 183.0 | 62.3, 99.6, 182.2  |
| Molecules/asymmetric unit                         | 3                 | 3                  |
| Resolution, Å*                                    | 25–2.4 (2.5–2.4)  | 20–2.18 (2.3–2.18) |
| $R_{\text{sym}}$ , %*                             | 9.5 (24.0)        | 7.0 (19.8)         |
| $\langle I \rangle / \langle \sigma(I) \rangle$ * | 11.8 (4.4)        | 7.2 (3.3)          |
| Unique reflections*                               | 86780 (8361)      | 108157 (14513)     |
| Completeness, %*                                  | 95.3 (80.1)       | 93.3 (84.6)        |
| Redundancy*                                       | 4.6 (2.3)         | 2.6 (2.2)          |

\*Numbers in parentheses refer to the highest-resolution shell.

**Table S3. Crystallographic refinement statistics**

|                                   | MM     | FI     |
|-----------------------------------|--------|--------|
| Resolution, Å                     | 25–2.4 | 20–2.2 |
| Reflections in work set           | 82430  | 101754 |
| $R_{\text{work}}$ , %             | 14.9   | 18.5   |
| Reflections in test set           | 4350   | 5404   |
| $R_{\text{free}}$ , %             | 19.3   | 22.2   |
| Total number of atoms             | 19506  | 19605  |
| Water molecules                   | 867    | 1019   |
| $\sigma_{\text{bond}}$ , Å        | 0.010  | 0.012  |
| $\sigma_{\text{angle}}$ , °       | 1.21   | 1.27   |
| Average B factors, Å <sup>2</sup> |        |        |
| Molecule 1                        | 35.5   | 10.6   |
| Molecule 2                        | 46.0   | 20.8   |
| Molecule 3                        | 41.6   | 15.7   |
